# Supplementary material for: Nitrogen-Doped Carbons Derived from Imidazole-Based Cross-Linked Porous Organic Polymers
Source: MDPI journal article supplement (doi:10.3390/molecules26030668), 2021-01-27
Supplement: s1 [file s1]

Electronic Supplementary Materials for:

**Nitrogen-Doped Carbons Derived from Imidazole-Based Cross-Linked  
Porous Organic Polymers**

Wojciech Kiciński\*, Sławomir Dyjak

*Institute of Chemistry, Military University of Technology, 2 Kaliskiego Str., PL 00-908  
Warsaw, Poland*

**\*Corresponding author. E-mail address:** wojciech.kicinski@wat.edu.pl (W. Kiciński)

**Syntheses of organic and carbon gels**

**1. CN: Imidazole-2-carboxaldehyde-based gels**

1.83 g of imidazole-2-carboxaldehyde and 0.80 g of phloroglucinol (molar ratio of 3:1), were dissolved in a mixture of 15 ml DMF and 6 ml isopropanol. A black solution was obtained upon heating to ca. 50-60 °C. The solution was acidified with 1.0 ml of concentrated hydrochloric acid. Upon acidification a wet solid gel was obtained instantaneously. Upon aging at 55 °C for 24 h (in a tight container) the gel was immersed in acetone to replace DMF and then dried at 70 °C for 24 h. Eventually 2.84 g of organic gel was obtained. The dried gel was subjected to pyrolysis under N<sub>2</sub>.

Pyrolysis at 750 °C – yield = 40%

Pyrolysis at 850 °C – yield = 36%

Pyrolysis at 950 °C – yield = 34%

## **2. CN(M): 1-Methylimidazole-2-carboxaldehyde-based gels**

2.10 g of 1-methylimidazole-2-carboxaldehyde and 0.80 g of phloroglucinol (molar ratio of 3:1) were dissolved in a mixture of 15 ml methanol and 6 ml isopropanol. Then the solution was acidified with 1.0 ml of concentrated hydrochloric acid. Upon acidification a wet solid gel was obtained after ca. 15 min. Upon aging at 55 °C for 24 h (in a tight container) the gel was dried at 70 °C for 24 h. Eventually 2.92 g of organic gel was obtained. The dried gel was subjected to pyrolysis under N<sub>2</sub>.

Pyrolysis at 750 °C – yield = 33%

Pyrolysis at 850 °C – yield = 29%

Pyrolysis at 950 °C – yield = 27%

## **3. CNS: 2-Thiazolecarboxaldehyde-based gels**

2.15 g (1.70 ml) of 2-thiazolecarboxaldehyde and 0.80 g of phloroglucinol (molar ratio of 3:1) were dissolved in a mixture of 15 ml methanol and 6 ml isopropanol. Then the solution was acidified with 1.0 ml of concentrated hydrochloric acid. Upon acidification a wet solid gel was obtained after ca. 15 min. Upon aging at 55 °C for 24 h (in a tight container) the gel was dried at 70 °C for 24 h. Eventually 2.64 g of organic gel was obtained. The dried gel was subjected to pyrolysis under N<sub>2</sub>.

Pyrolysis at 750 °C – yield = 35%

Pyrolysis at 850 °C – yield = 33%

Pyrolysis at 950 °C – yield = 30%

**Table S1. Elemental analysis (wt.%) and textural characteristics of the organic and carbon gels obtained from a phloroglucinol/aldehyde mixture of 1:2 molar ratio.**

| Sample    | N (%) | C (%) | H (%) | S (%) | S <sub>BET</sub><br>(m <sup>2</sup> g <sup>-1</sup> ) | V <sub>t</sub><br>(cm <sup>3</sup> g <sup>-1</sup> ) |
|-----------|-------|-------|-------|-------|-------------------------------------------------------|------------------------------------------------------|
| CN        | 15.55 | 44.46 | 4.94  | -     | -                                                     | -                                                    |
| CN-750    | 10.61 | 77.72 | 1.62  | -     | 490                                                   | 0.20                                                 |
| CN-850    | 8.09  | 75.71 | 1.81  | -     | 500                                                   | 0.22                                                 |
| CN-950    | 6.64  | 88.52 | 0.57  | -     | 510                                                   | 0.23                                                 |
| CN(M)     | 14.69 | 44.82 | 5.24  | -     | -                                                     | -                                                    |
| CN(M)-750 | 9.01  | 77.94 | 1.72  | -     | 517                                                   | 0.23                                                 |
| CN(M)-850 | 7.10  | 78.33 | 1.70  | -     | 510                                                   | 0.22                                                 |
| CN(M)-950 | 5.39  | 89.87 | 0.53  | -     | 497                                                   | 0.21                                                 |
| CNS       | 7.14  | 43.25 | 3.43  | 15.77 | -                                                     | -                                                    |
| CNS-750   | 5.27  | 77.74 | 1.31  | 7.16  | 680                                                   | 0.28                                                 |
| CNS-850   | 4.30  | 79.36 | 1.18  | 5.71  | 705                                                   | 0.29                                                 |
| CNS-950   | 3.56  | 85.81 | 0.72  | 4.49  | 765                                                   | 0.33                                                 |

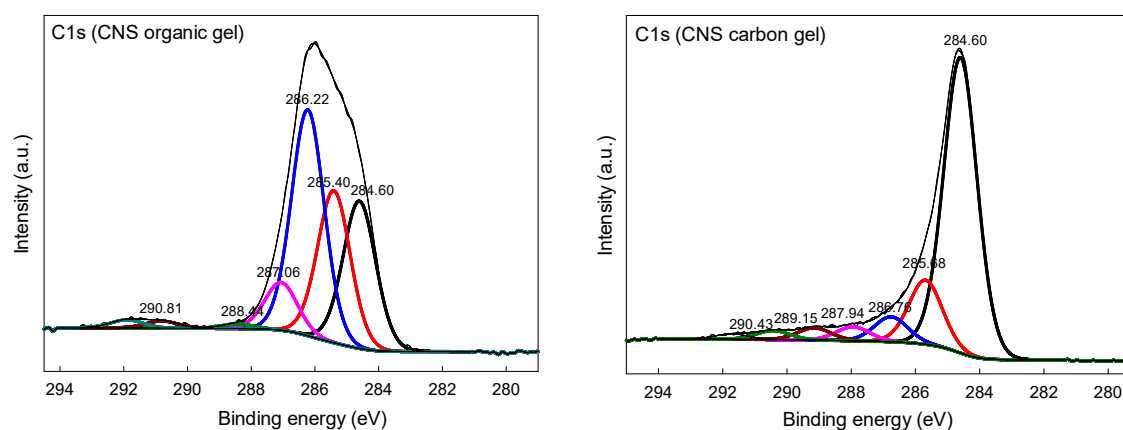

**Figure S1. High resolution XPS spectra of C 1s of organic and corresponding carbon gels obtained from 2-thiazolecarboxaldehyde via pyrolysis at 750 °C.**

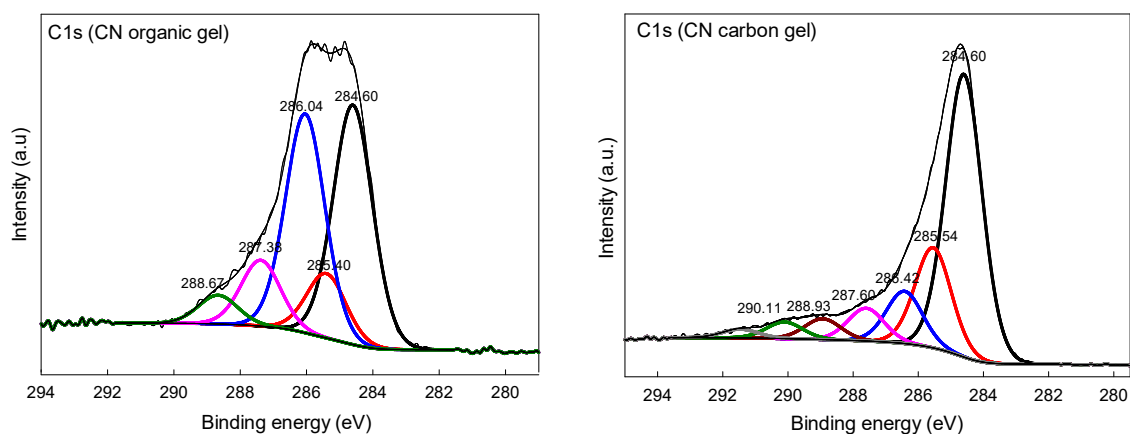

**Figure S2.** Comparison of high resolution XPS spectra of C 1s of organic and corresponding carbon gels obtained from imidazole-2-carboxaldehyde via pyrolysis at 750 °C.

**Table S2.** Elemental surface composition of the N-doped and N,S co-doped samples (the organic and carbon gels obtained from a phloroglucinol/aldehyde mixture of 1:3 molar ratio) based on the survey XPS spectra.

| Sample                | Elemental surface composition (at.%) |      |      |     |               |
|-----------------------|--------------------------------------|------|------|-----|---------------|
|                       | C                                    | N    | O    | S   | Cl (from HCl) |
| CNS (organic polymer) | 67.4                                 | 7.9  | 16.0 | 8.0 | 0.7           |
| CN (organic polymer)  | 64.4                                 | 10.5 | 20.7 | 0   | 2.6           |
| CNS-750               | 90.7                                 | 3.3  | 2.0  | 3.6 | 0             |
| CN-750                | 77.7                                 | 7.8  | 9.6  | 0.4 | 0             |

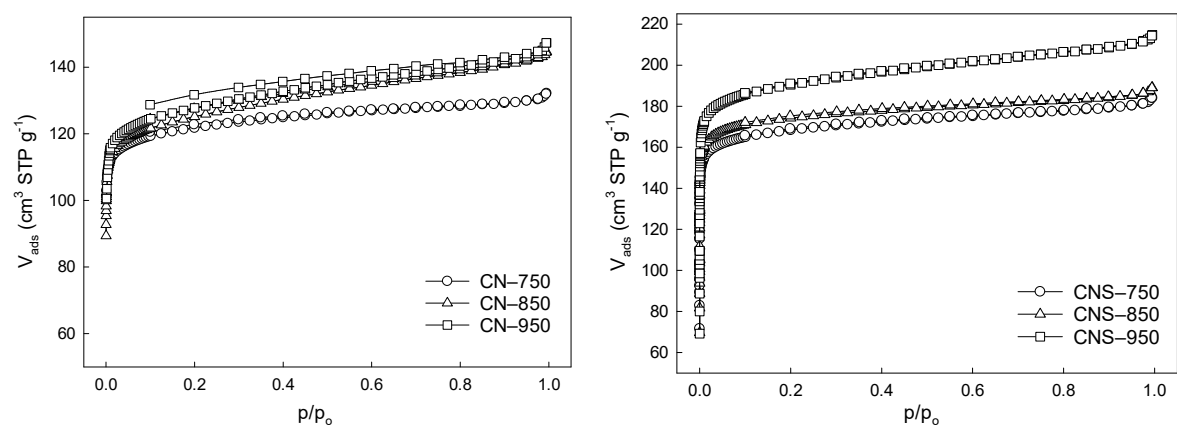

**Figure S3.** N<sub>2</sub> adsorption-desorption isotherms of the doped carbon gels CN and CNS obtained from a phloroglucinol:aldehyde molar ratio of 1:2 and pyrolyzed at different temperatures.
